# Supplementary material
Source: PubMed Central journal article supplement (PMC5076880)
Supplement: NIHMS819896-supplement-supplemental.pdf [file NIHMS819896-supplement-supplemental.pdf]

## Supporting Information

### Optofluidic Sensing from Inkjet-Printed Droplets: the Enormous Enhancement by Evaporation-Induced Spontaneous Flow on Photonic Crystal Biosilica

Xianming Kong<sup>a§</sup>, Yuting Xi<sup>a§</sup>, Paul LeDuff<sup>b</sup>, Erwen Li<sup>a</sup>, Ye Liu<sup>a</sup>, Li-Jing Cheng<sup>a</sup>, Gregory L. Rorrer<sup>b</sup>, Hua Tan<sup>c\*</sup>, Alan X. Wang<sup>a\*</sup>

<sup>a</sup> School of Electrical Engineering and Computer Science, Oregon State University, Corvallis, OR, 97331, USA. wang@eecs.oregonstate.edu

<sup>b</sup> School of Chemical, Biological & Environmental Engineering, Oregon State University, Corvallis, OR, 97331, USA

<sup>c</sup> School of Engineering and Computer Science, Washington State University-Vancouver, Vancouver, WA, 98686, USA. hua.tan@wsu.edu

§These two authors contributed equally to the manuscript

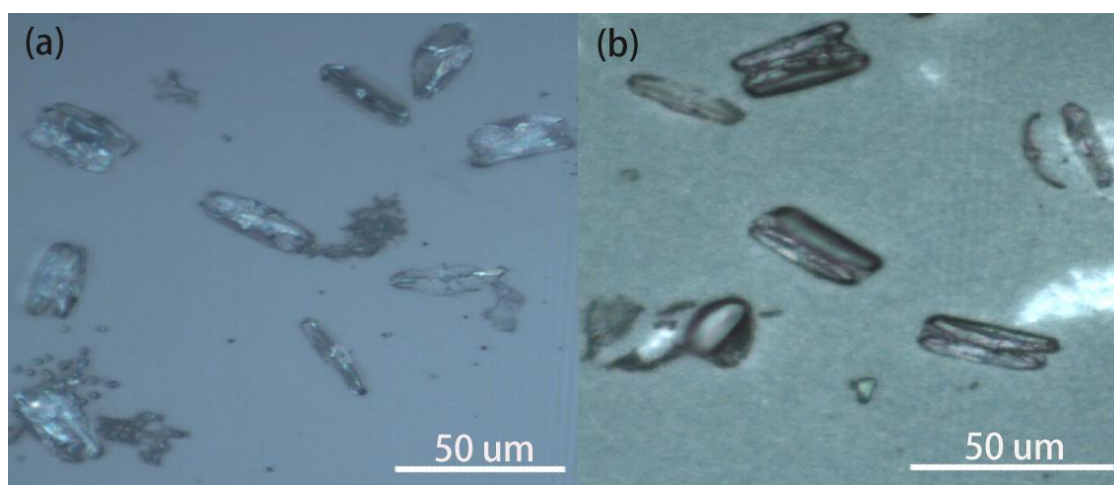

**Figure S1** The microscopic optical images of the diatom frustules (a) and diatom-Ag NPs after inkjet-printing (b).

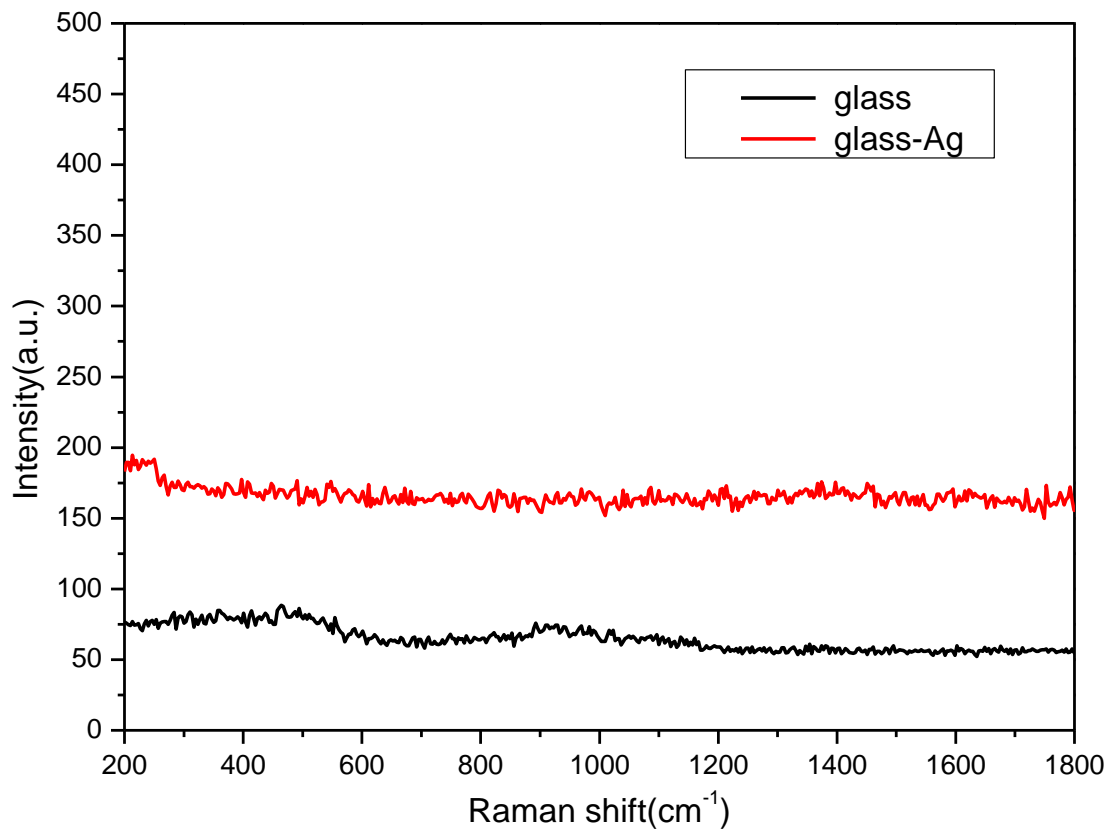

**Figure S2** Raman spectra of glass and glass-Ag NPs.

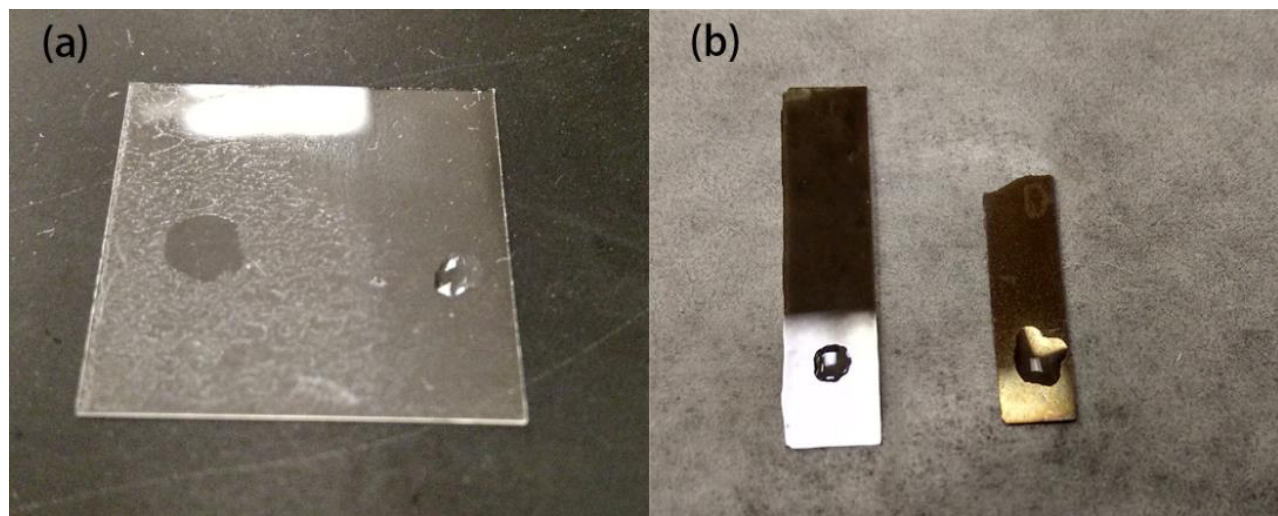

**Figure S3** Image of 2  $\mu$ L droplet of water on glass with and without diatom (a) and on glass-Ag NPs and diatom-Ag NPs SERS substrate (b).

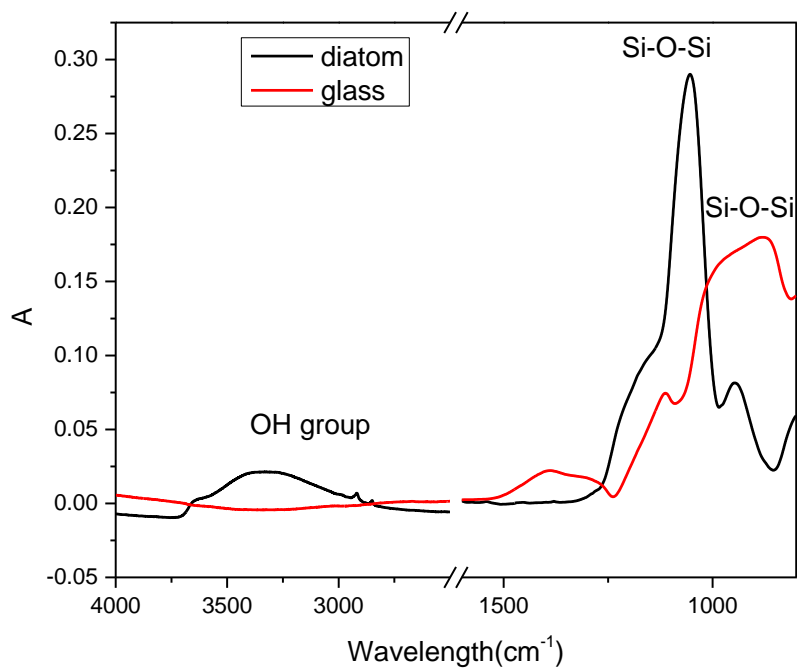

**Figure S4** FTIR spectra of glass and glass-diatom.

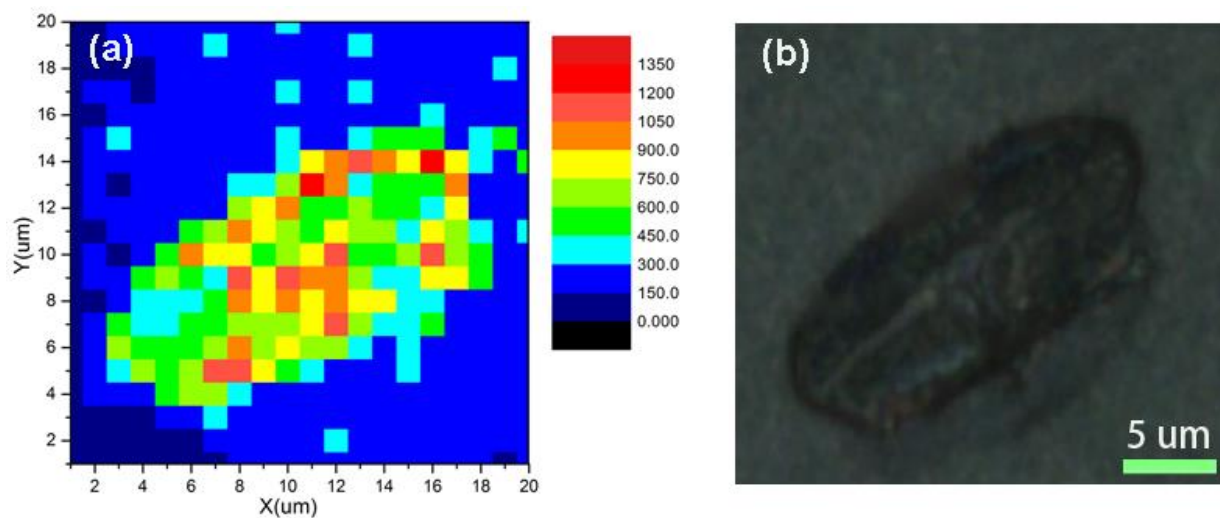

**Figure S5** Raman mapping image of 400 droplets TNT ( $10^{-5}$  M) on a single diatom SERS substrate (a) and the corresponding microscopy image (b).
